# Supplementary material for: Deciphering polymer degradation chemistry via integrating new database construction into suspect screening analysis
Source: Royal Society of Chemistry journal article supplement (doi:10.1039/d4em00212a), 2024-01-01
Supplement: d4em00212a2.pdf [file d4em00212a2.pdf]

## Supporting Information

### Deciphering polymer degradation chemistry via integrating novel database construction into nontarget analysis

Phoebe Keyes<sup>1</sup>, Noor Halimah<sup>1</sup>, Boya Xiong<sup>1</sup>

<sup>1</sup> Department of Civil, Environmental, and Geo-Engineering, University of Minnesota

#### Detection of features in homologue series

Homologue series compounds were detected by searching for triplicate features for which the calculated molecular weight had a mass difference of the acrylamide monomer (71.03114 Da) or a multiple of this. A 5-ppm error was allowed for these comparisons.

To create the Kendrick mass defect plots, the Kendrick ratio (R) for acrylamide was calculated.

$$R = \frac{\text{Nominal Monomer Mass}}{\text{Monomer Mass}} \quad \text{(Equation 1)}$$

This value, R was used to calculate the Kendrick mass of each feature.

$$\text{Kendrick Mass} = \text{MW} \times R \quad \text{(Equation 2)}$$

Finally, the Kendrick Mass Defect (KMD) was calculated for each feature.

$$\text{KMD} = \text{Nominal Mass of Feature} - \text{Kendrick Mass} \quad \text{(Equation 3)}$$

The KMD was then plotted against the MW of all features to get a KMD plot.

#### Polymer standard SEC analysis

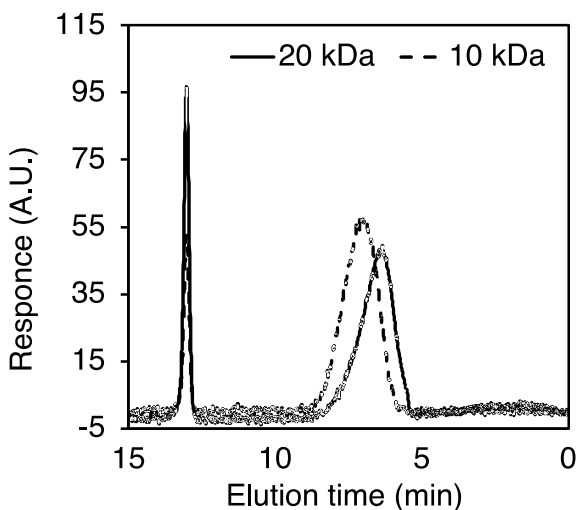

**Figure S1.** The SEC trace of the 20 kDa (solid line) and 10 kDa (dotted line) polymer standard material from the American Polymer Standards (5 g/L). The low molecular weight peak persisted in the SEC trace of different polymer standard solutions, suggesting the lower MW peak was non-PAM features.

#### Dialysis test to examine the nature of the low MW features.

A 5 g/L polyacrylamide (PAM) solution was prepared by dissolving PAM (10,000 g/mol, 50% w/w in water, Sigma Aldrich, MO) in MilliQ water for 24 h under magnetic stirring. The 30

33 mL of solution was added to a 3.5 kDa dialysis bag (Spectra/Por 3 Dialysis Membrane Standard  
 34 RC Tubing, Fisher Scientific, NH). This bag was suspended in 5 L of milliQ water for 72 h with  
 35 magnetic stirring in the milliQ water. Non-purgeable organic carbon (NPOC) measurements were  
 36 taken on TOC-V series organic carbon analyzer (Shimadzu, Japan). The samples before and after  
 37 dialysis were analyzed for NPOC (**Fig. S2A**) and molecular weight profile via SEC (**Fig. S2B**).

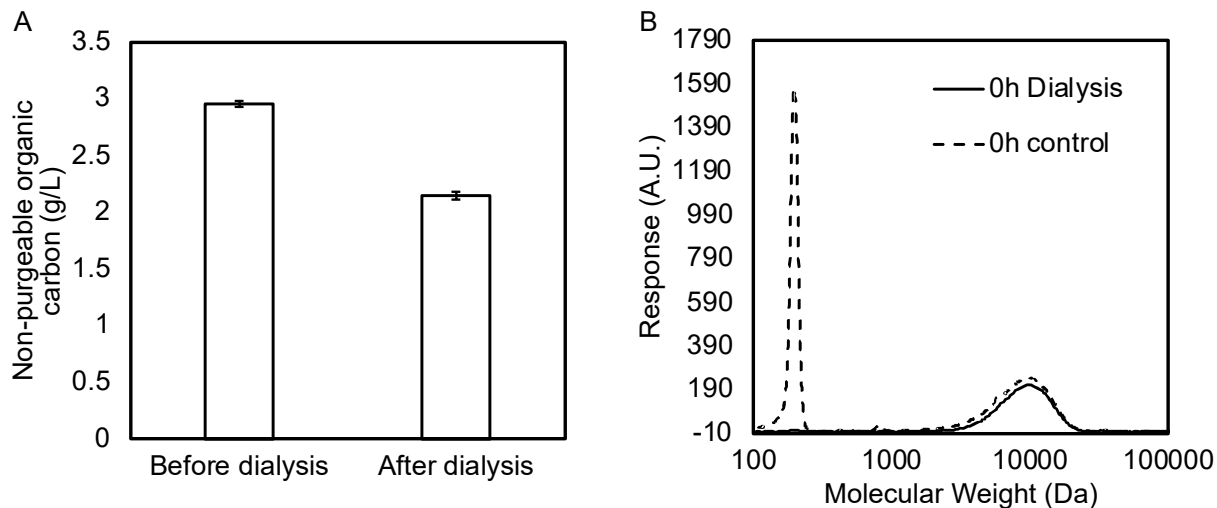

38  
 39 **Figure S2. A)** The TOC measurements of undegraded polymer solution (5 g/L) before ( $2.96 \pm$   
 40  $0.03$  g/L) and after ( $2.15 \pm 0.04$  g/L) dialysis for 72 hours in a 3.6 kDa dialysis bag (27.4%  
 41 reduction). This reduction cannot be attributed to dilution because the volume in the bag was  
 42 unchanged before and after dialysis. **B)** The SEC trace of the polymer solution before and after  
 43 dialysis.

44  
 45 Polymer purification via preparative SEC

46 An identical undegraded polymer solution described above was prepared and injected (30  
 47  $\mu$ L) into the SEC column using 0.001 M  $\text{Na}_2\text{SO}_4$  as mobile phase and a flow rate of 0.5 mL/min.  
 48 The polymer fraction that was eluted from 5-10 mL was collected as one fraction which  
 49 corresponded to the SEC peak of the polymer. This fraction was then analyzed on HRMS and  
 50 analyzed via the stated workflow.

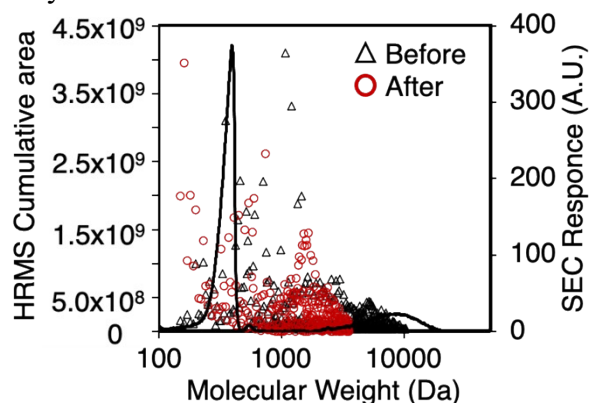

51  
 52 **Figure S3.** The SEC trace of undegraded and unfractionated polymer (line) and the HRMS profile  
 53 of the sample before fractionation (black points) and after peak fraction of SEC (red points).  
 54 Surprisingly, there were still low molecular weight features on HRMS after SEC fractionation.

55

56 Calculation of HRMS average molecular weight (MW)

57 The average MW was calculated using the HRMS signal. First, the total area of all the  
58 peaks was calculated (i.e., group area, GA). This was then used to calculate the fraction of each

59 peak area at a given MW relative to the total area (i.e.,  $\frac{GA_{MW}}{\sum GA}$ ).

$$\text{Average MW} = \sum_{MW} MW \times \frac{GA_{MW}}{\sum GA}$$

60

(Equation 4)

61 For the starting polymer, HRMS features with the MW  $\geq 600$  Da were considered in this  
62 calculation because it was confirmed that features lower in MW than this were non-polyacrylamide  
63 features (observed via manual inspection of features). Note that the accuracy of the measured mass  
64 decreases with increasing MW because the resolving power is constant at R=120,000 across  
65 different MWs ( $R = \text{mass}/\Delta\text{mass}$ , where  $\Delta\text{mass}$  is a measure of mass accuracy).<sup>1</sup>

66

67 Hydrolysis analysis of 24h control sample

68 The 24h control sample was a mixture of polyacrylamide (500 mg/L) at pH 3.5 heated at  
69 80°C for 24h without the addition of persulfate.

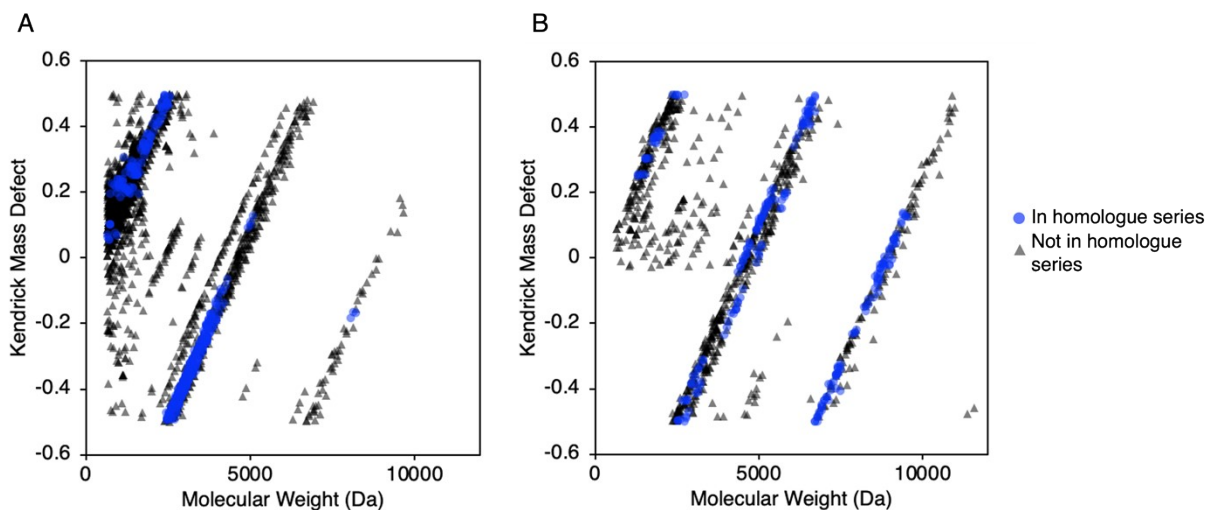

70

71 **Figure S4.** The Kendrick mass defect plots of **A)** undegraded polymer and **B)** the 24h control  
72 polymer with acrylic acid ( $C_3H_4O_2$ ) as the Kendrick formula with features in homologue  
73 highlighted in blue.

74

75 According to SEC, we see no molecular weight reduction in our 24h control sample (**Fig. S5**).

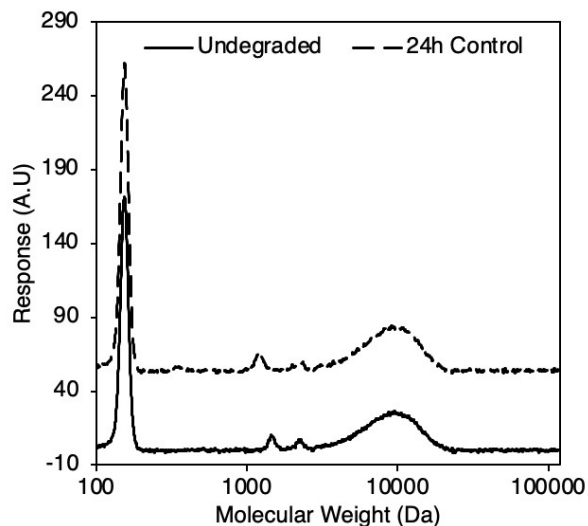

76  
77 **Figure S5.** The molecular weight profile of undegraded polymer (solid) and 24h control (dashed)  
78 detected by SEC-UV.

79  
80 Example MS<sup>1</sup> spectra showing incorrect monoisotopic peak assignment using the conventional  
81 nontarget workflow.

82

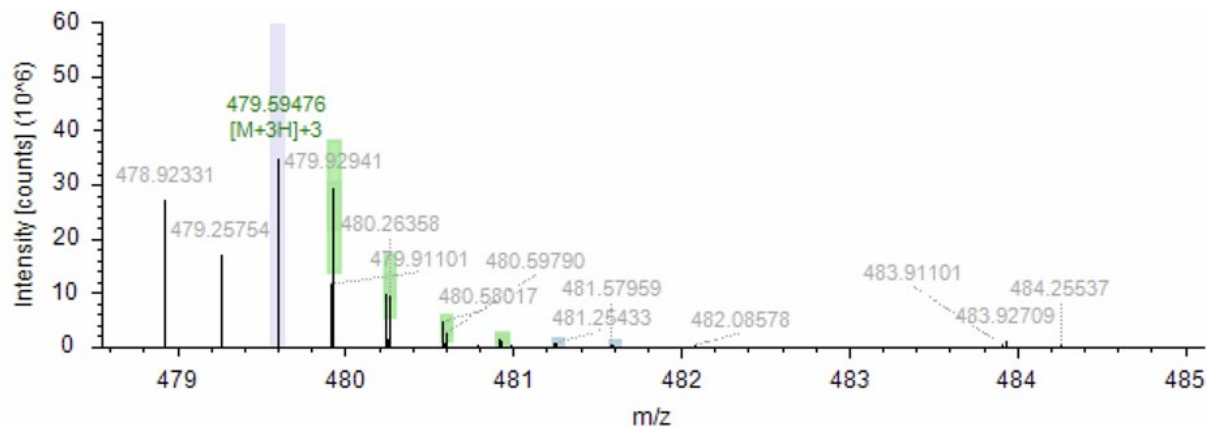

83

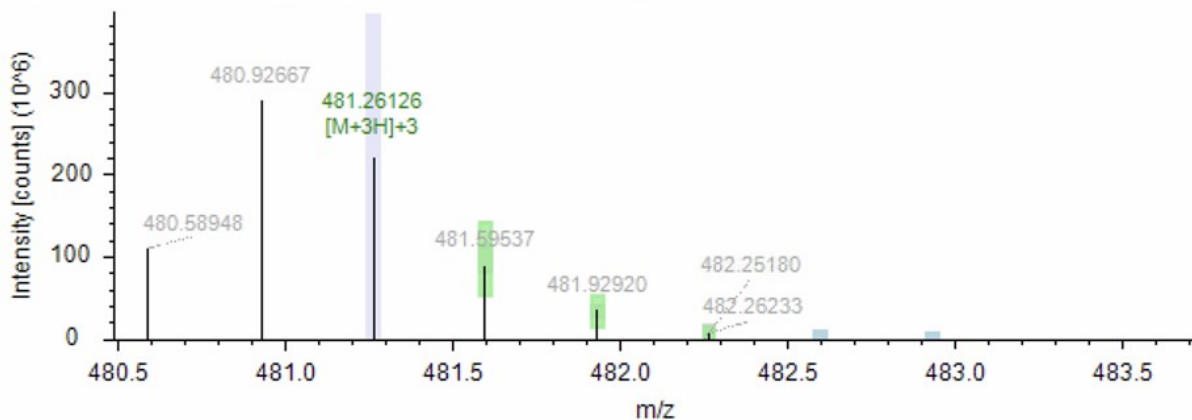

84  
85 **Figure S6.** The MS<sup>1</sup> spectra of features with incorrect monoisotopic peak assignment by  
86 conventional workflow using Compound Discoverer. The assigned monoisotopic peak for both

87 features (shaded with a light purple bar) had  $m/z = 479.59476$  for top figure and  $m/z = 481.26126$   
88 for bottom figure. Both monoisotopic peaks were followed by lower  $m/z$  peaks with a  $\Delta m/z \cong$   
89 0.333, which indicated these peaks were part of an isotopic pattern of a parent ion with charge +3.  
90 Additionally, overlapping peaks in the top spectrum with very close  $m/z$  values (i.e.,  
91  $m/z=479.91101$  and  $479.92941$ ) in the isotopic pattern may affect the monoisotopic peak  
92 assignment (i.e.,  $m/z= 478.92331$  is the monoisotopic peak of this feature).  
93

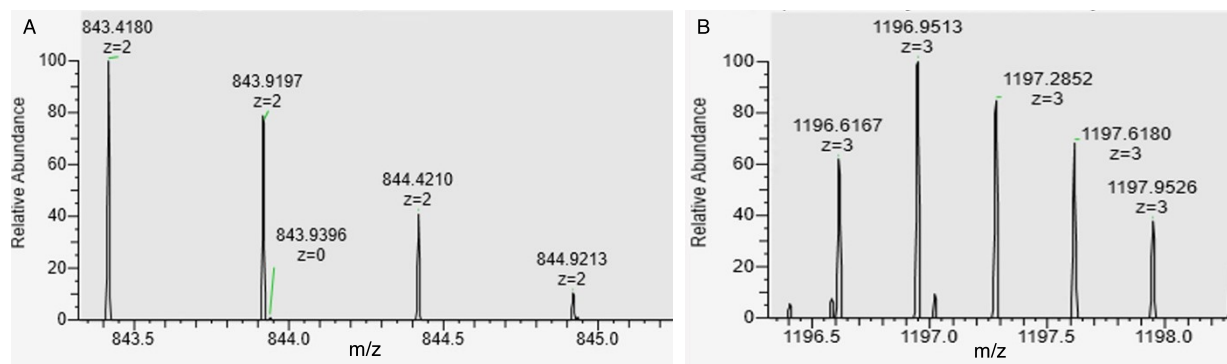

94  
95 **Figure S7.** Example spectra of isotopic pattern demonstrating that the monoisotopic peak is not  
96 always the peak with the highest intensity. **A)** isotopic pattern of an accurate mass of 1,688.856  
97 Da, where the monoisotopic peak is the highest intensity peak in the isotopic pattern  
98 ( $m/z=843.4180$ ), and **B)** isotopic pattern of an accurate mass of 3,592.8801 Da, where the  
99 monoisotopic peak is not the highest intensity peak but rather the peak  $m/z=1196.6167$  in the start  
100 of isotopic pattern.

101

102 Attempt to resolve monoisotopic peak misassignment by extending LC method.

103 To better resolve many features eluting between 10 to 25 min, the reverse phase liquid  
104 chromatography (RPLC) method was extended from 45 min to 2 h with the same gradient profile.  
105 The mobile phase gradient of LC run was set at: 1) 1% B for 5 min at  $1 \mu\text{L}/\text{min}$ , 2) then changed  
106 to 20% B at  $0.20 \mu\text{L}/\text{min}$  over 87.5 min, 3) changed to 95% B at  $0.20 \mu\text{L}/\text{min}$  over 17.5 min, and  
107 4) finally held at 95% B for 10 min at  $1.0 \mu\text{L}/\text{min}$ . Only undegraded polymer was tested. To  
108 evaluate if there was an improvement after applying this extended LC method, the modified van  
109 Krevelen diagram was created for the newly generated raw features after being processed by the  
110 conventional workflow. Only 14.4% of features detected on the extended method was within  
111 theoretical limits, comparing to the 21.5% of original LC method. Thus, the extended LC method  
112 was not adopted for following study.

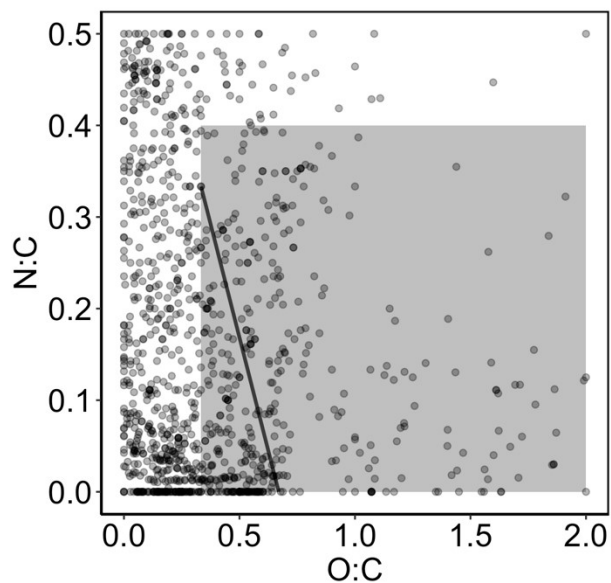

113

114 **Figure S8.** The modified van Krevelen diagram for features of undegraded PAM detected using  
115 the extended LC method. The shaded area represents the theoretical boundaries of PAM and its  
116 degraded products by free radical degradation and hydrolysis. The solid black line represents the  
117 hydrolysis products of undegraded polymer. The molecular formulas were predicted directly from  
118 the Compound Discoverer software.

119

120 *Summary of detected features.*

121

122 **Table S1.** Summary of the number of features detected in PAM (triplicate) degraded over a specific time. The numbers included features:  
123 detected after blank subtraction (Total features detected), detected after peak picking, matched with the newly constructed databases,  
124 and matched with compound classes. Additionally, for the database and compound class matches, the number of matches for the given

| Degradation time (hours) | Total features detected | After peak picking | Database matches | Occurrence specific end groups <sup>a</sup> |          |        |                 | Compound class matches |          |        |
|--------------------------|-------------------------|--------------------|------------------|---------------------------------------------|----------|--------|-----------------|------------------------|----------|--------|
|                          |                         |                    | Total            | Methyl or methylene                         | Aldehyde | Ketone | Carboxylic acid | Total                  | Aldehyde | Ketone |
| 0                        | 5,605                   | 2,315              | 259              | 122                                         | 182      | 161    | 53              | 40                     | 37       | 3      |
| 1                        | 9,702                   | 4,790              | 101              | 79                                          | 53       | 56     | 14              | 548                    | 545      | 3      |
| 5                        | 8,385                   | 5,149              | 54               | 58                                          | 24       | 20     | 6               | 508                    | 506      | 2      |
| 10                       | 8,794                   | 5,642              | 87               | 80                                          | 62       | 25     | 7               | 504                    | 502      | 2      |
| 24                       | 4,112                   | 2,655              | 35               | 30                                          | 25       | 13     | 2               | 152                    | 151      | 1      |

125 end group is noted.

126 <sup>a</sup> Every feature contributed two end groups to the total count.

127

128 *Proposed propagation reaction pathways*

129

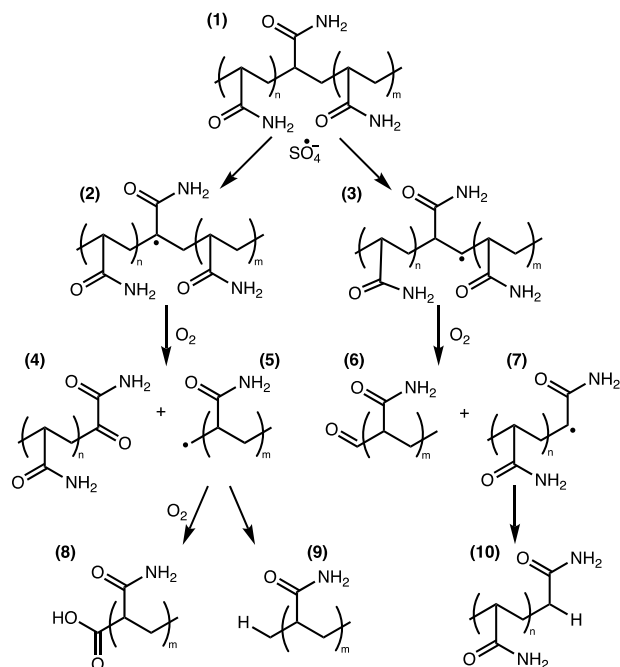

130

131 **Figure S9.** The reaction cascade for the radical induced oxidative chain scission of polyacrylamide  
 132 (1). Sulfate radicals abstract the hydrogen on the tertiary (2) or secondary (3) carbon on the  
 133 polymer backbone. In the presence of oxygen, the tertiary carbon radical can produce a ketone  
 134 terminal group (4) and a terminal primary carbon radical (5). The secondary radical (3), in the  
 135 presence of oxygen, can produce an aldehyde terminal group (6) and another radical on the  
 136 secondary carbon (7).<sup>2,3</sup> These formed radicals (5 and 7) can terminate either via abstracting a  
 137 hydrogen from an adjacent polymer chain (intra- or inter- chain) to form a methyl (9) or methylene  
 138 (10) group,<sup>4</sup> or the terminal primary carbon radical (5) can react with oxygen and undergo a  
 139 rearrangement to form carboxylic acid (8).<sup>5</sup>

140

141 *Novel database construction based on previously proposed reaction mechanisms.*

142 The construction of these databases included the following combinations of end groups: aldehyde-  
 143 aldehyde, aldehyde-ketone, aldehyde-methyl, aldehyde-methylene, aldehyde-carboxylic acid,  
 144 ketone-ketone, ketone-methyl, ketone-methylene, ketone-carboxylic acid, and methyl-methylene.  
 145 Focusing on our interest in understanding aldehyde and ketone containing features, only the  
 146 structures with aldehyde or ketone end groups were further paired with methyl, methylene, and  
 147 carboxylic acid end groups. We also added methyl-methylene end group pairs because they are  
 148 the assumed end groups of our starting polymer.

149

150 **Table S2.** The number of unique formulas for a given end group combinations in the constructed  
 151 databases. The total amount of unique formulas is 463,665.

| End Groups        | Number of Formula |
|-------------------|-------------------|
| Aldehyde-aldehyde | 29,068            |
| Aldehyde-ketone   | 57,458            |
| Ketone-ketone     | 86,190            |



|                          |        |
|--------------------------|--------|
| Aldehyde-methyl          | 29,068 |
| Aldehyde-methylene       | 57,460 |
| Aldehyde-carboxylic acid | 29,068 |
| Ketone-methyl            | 29,068 |
| Ketone-methylene         | 86,190 |
| Ketone-carboxylic acid   | 57,460 |
| Methyl-methylene         | 29,068 |

152

153 Aldehyde and Ketone products detected by database matches and abundance calculation.

154 For each replicate sample at a specific degradation time point, the area measured for each  
 155 feature was summed across all features that matched with aldehyde or ketone end group formulas  
 156 in database. The total summed areas for aldehydes and ketones were averaged across triplicate  
 157 samples at each degradation time point, which was used as the abundance of each end groups.  
 158 Then their ratio of (i.e., aldehyde/ketone) was reported in **Fig. 4B**. The reported error was properly  
 159 propagated considering the calculation of the ratio.

160

161 Aldehyde and Ketone formation detected by the Compound Class approach.

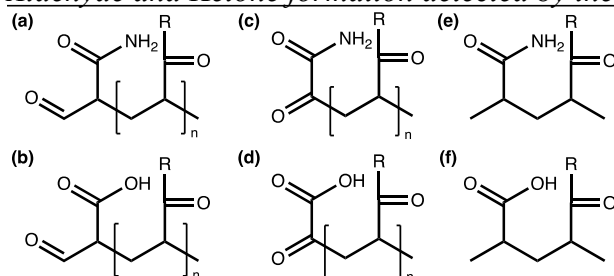

162

163 **Figure S10.** The oligomers used to generate *in silico* fragments for the Compound Class MS<sup>2</sup>  
 164 databases for aldehyde and ketone detection. The representative structure of **A**) an aldehyde  
 165 terminal group with an amide side chain and *n* neighboring monomers of any hydrolysis state, **B**)  
 166 an aldehyde terminal group with a carboxylic acid side chain and *n* neighboring monomers of  
 167 any hydrolysis state, **C**) a ketone terminal group with an amide side chain and *n* neighboring  
 168 monomers of any hydrolysis state, **D**) a ketone terminal group with a carboxylic acid side chain  
 169 and *n* neighboring monomers of any hydrolysis state, **E**) a two monomer long unit with methyl  
 170 end groups and at least one amide side chain, and **F**) a two monomer long unit with methyl  
 171 end groups and at least one carboxylic acid side chain.

172

173 Using the ThermoFisher MassFrontier software, a terminal group-specific fragment list was  
 174 generated by *in silico* fragmentation of proposed oligomers containing an aldehyde or a ketone  
 175 terminal group (**Fig. S18**). The list of fragments was further selected based upon whether they are  
 176 unique to aldehyde or ketone end groups, but also are independent of 1) whether the neighboring  
 177 group contains an amide or carboxylic group and 2) the number of repeating units in the structure  
 178 (from *n*=1 to 2). To do so, first, structures with only two repeating units (*n*=1) were considered.  
 179 The list of formulas for structure **(a)** was first compared to a list for ketone end group without  
 180 hydrolysis **(c)**, and only formulas that were unique for **(a)** were included. The same process was  
 181 repeated by comparing this generated list with a list for structure **(e)**. This updated list was then  
 182 compared to a formula list from the fragmentation of structure **(a)** where R=OH, and only  
 183 formulas that were present in both were retained. This updated list was then unique to the  
 184 fragmentation of structures uniquely with aldehyde end groups, but was independent of hydrolysis

185 of neighboring monomer. Finally, the remaining formulas in this list were compared to a list  
 186 generated for formulas of (a) where n=2 so the list was independent of number of repeating units.  
 187 The same process was repeated for (b) by comparing to (d) and (f) where the terminal monomer  
 188 is hydrolyzed. A similar process is repeated for (c) and (d) but comparing  
 189 to (a) and (b) respectively in the first step (Fig. S10). All comparisons were done directly in a  
 190 customized R code by comparing the formula of the fragmentation structure (therefore the m/z of  
 191 the fragments). The lists of compound class were used to flag features with MS<sup>2</sup> spectra that  
 192 contained one of the listed structures.

193

194 **Table S3.** The formula and structures generated from fragmentation of **aldehyde** end group  
 195 structures using MassFrontier and were used in Compound Class search. This includes fragments  
 196 from Fig S10 a & b.

| Formula                                                    | Structure |
|------------------------------------------------------------|-----------|
| C <sub>6</sub> H <sub>11</sub> O <sub>3</sub> <sup>+</sup> |           |
| C <sub>5</sub> H <sub>7</sub> O <sub>4</sub> <sup>+</sup>  |           |
| C <sub>5</sub> H <sub>8</sub> NO <sub>3</sub> <sup>+</sup> |           |
| C <sub>6</sub> H <sub>9</sub> O <sub>3</sub> <sup>+</sup>  |           |

|               |  |
|---------------|--|
| $C_7H_7O_2^+$ |  |
| $C_6H_9O_2^+$ |  |
| $C_6H_7O^+$   |  |
| $C_4H_6NO^+$  |  |
| $C_2H_3O^+$   |  |

197  
198

199 **Table S4.** The formula and structures generated from fragmentation of **ketone** end group  
 200 structures using MassFrontier and were used in Compound Class search. **Fig S10 c & d.**  
 201

| Formula                                                    | Structure |
|------------------------------------------------------------|-----------|
| C <sub>6</sub> H <sub>8</sub> NO <sub>2</sub> <sup>+</sup> |           |
| C <sub>4</sub> H <sub>5</sub> O <sub>4</sub> <sup>+</sup>  |           |

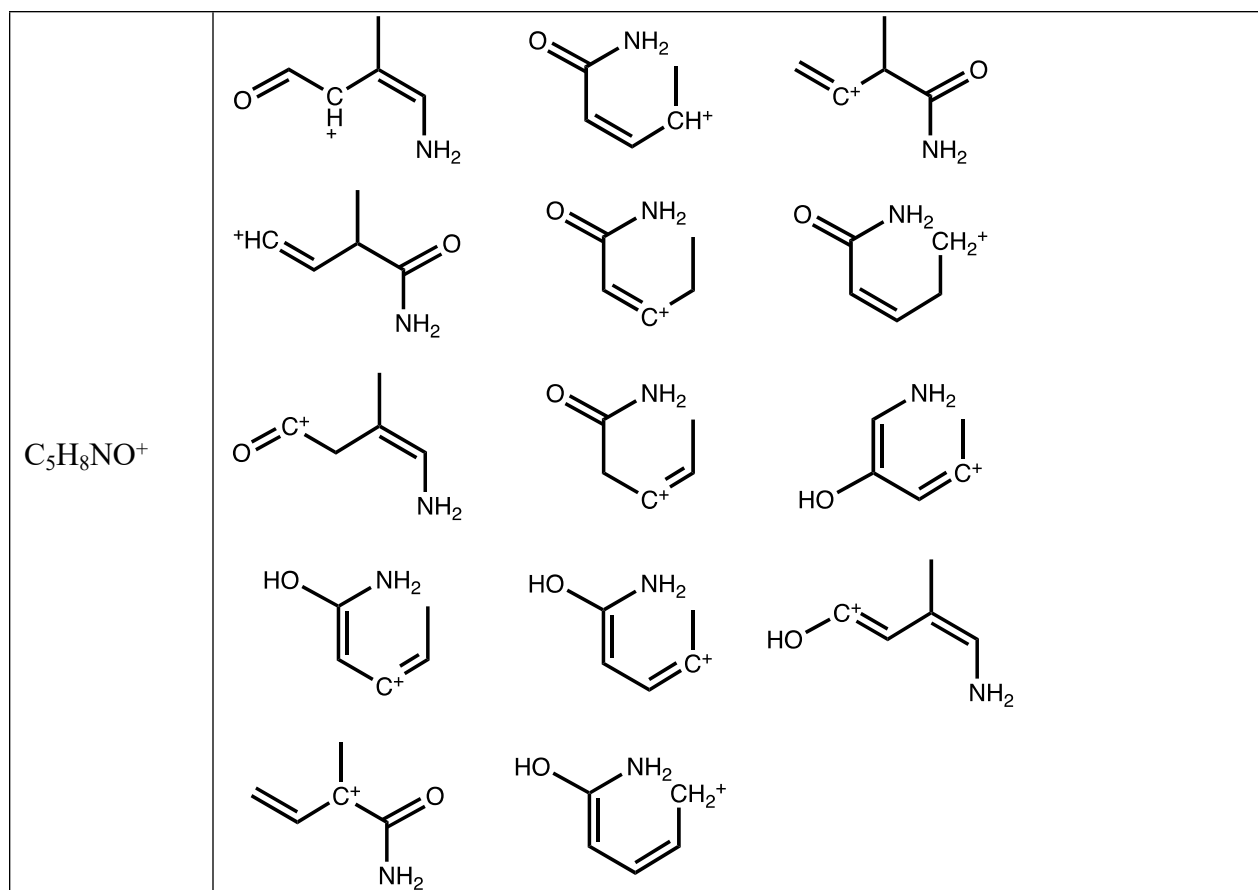

202  
203

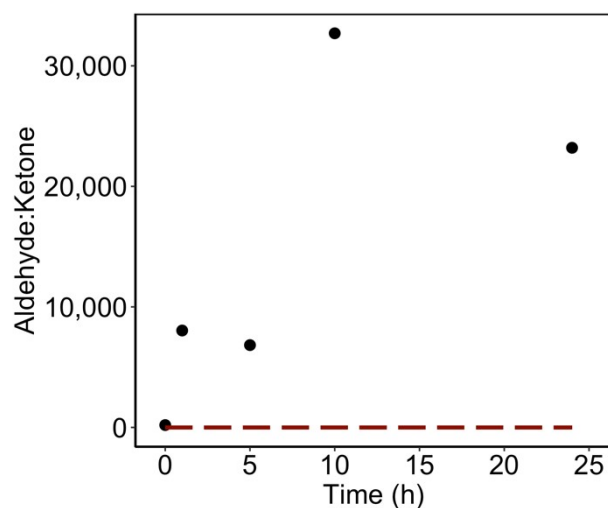

204

205 **Figure S11.** The ratio of total peak area of aldehydes and ketones calculated from all features  
 206 matched with each compound class. These results showed a similar conclusion regarding the  
 207 relative abundance of aldehyde to ketone drawn from the application of the novel MS<sup>1</sup> database,  
 208 however the ratio was significantly higher. The red dashed line represented previously reported  
 209 ratios of the abundance of carbon centered at secondary versus tertiary carbons for the degradation  
 210 of polyacrylamide.<sup>6-8</sup>

211

212 FISh scoring analyses on selected formulas predicted based on matched MS<sup>1</sup> features.

213 The Fragment Ion Search (FISh) score was calculated by comparing the MS<sup>2</sup> spectrum  
 214 predicted by *in silico* fragmentation to the measured MS<sup>2</sup> spectra of a given proposed parent  
 215 structure using the Compound Discoverer. The FISh score is the percentage of MS<sup>2</sup> features that  
 216 matched with the predicted features over the total detected features (**Eqn 5**). FISh score was  
 217 calculated by applying a high accuracy mass tolerance of 2.5 mmu, a low accuracy mass tolerance  
 218 of 0.5 Da, and a S/N threshold of 3.

219

$$\text{FISh Score} = \frac{\text{\# of matched MS}^2 \text{ features}}{\text{\# of total MS}^2 \text{ features measured}} \times 100$$

220

221

**(Equation 5)**

222 **Table S5.** The formula and representative structures used for FISh scoring. For each formula, the  
 223 structures of all possible isomers were created considering the placement of the amide or  
 224 carboxylic acid side chains and with the overall restriction of PAM relevant structures. The number  
 225 of isomers for each generic structure was reported in the Table.

| Formula                                                       | Generic Structure | Number of Isomers |
|---------------------------------------------------------------|-------------------|-------------------|
| C <sub>13</sub> H <sub>22</sub> N <sub>4</sub> O <sub>5</sub> |                   | 1                 |
| C <sub>14</sub> H <sub>23</sub> N <sub>5</sub> O <sub>6</sub> |                   | 5                 |
| C <sub>15</sub> H <sub>19</sub> NO <sub>11</sub>              |                   | 5                 |
| C <sub>15</sub> H <sub>25</sub> N <sub>4</sub> O <sub>7</sub> |                   | 1                 |
| C <sub>15</sub> H <sub>26</sub> N <sub>4</sub> O <sub>6</sub> |                   | 5                 |
| C <sub>15</sub> H <sub>27</sub> N <sub>5</sub> O <sub>5</sub> |                   | 1                 |

|                         |  |    |
|-------------------------|--|----|
| $C_{16}H_{26}N_4O_7$    |  | 5  |
| $C_{16}H_{27}N_5O_6$    |  | 1  |
| $C_{18}H_{30}N_4O_8$    |  | 15 |
| $C_{18}H_{31}N_5O_7$    |  | 6  |
| $C_{26}H_{44}N_8O_{11}$ |  | 9  |
| $C_{26}H_{43}N_9O_{10}$ |  | 1  |
| $C_{28}H_{47}N_9O_{10}$ |  | 1  |
| $C_{30}H_{50}N_8O_{12}$ |  | 45 |

226  
227

228 **Table S6.** The MS<sup>2</sup> *in silico* fragmentation match results for each structural match. The Compound Discoverer (CD) 3.3 and MetFrag  
 229 web-based software results are included for each feature. For CD, the top structure match is reported, as well as the matched fragments  
 230 between the detected fragments on MS<sup>2</sup> and the *in silico* fragments predicted for that structure. The FISh score is reported for each  
 231 structural match. For MetFrag, the structural match is reported if it is different from the top match according to CD. The matched  
 232 fragments according to MetFrag are also listed, and the raw MetFrag score is reported for each match. When the top structure is the  
 233 same for each software, the fragments that are commonly matched in both software are highlighted in green, and the total number is  
 234 listed. When the top structural matches are different, this information is not included. Finally, the Schymanski level of confidence match  
 235 is reported for each feature.

| Formula                                                       | Compound Discoverer                                                                 |                                                                                                                                      |            | MetFrag                                                                              |                                                                                             |               | Number of common fragments | Level of Match |
|---------------------------------------------------------------|-------------------------------------------------------------------------------------|--------------------------------------------------------------------------------------------------------------------------------------|------------|--------------------------------------------------------------------------------------|---------------------------------------------------------------------------------------------|---------------|----------------------------|----------------|
|                                                               | Structure Match                                                                     | Matched Fragments                                                                                                                    | FISh Score | Structure Match (if different from CD)                                               | Matched Fragments                                                                           | MetFrag Score |                            |                |
| C <sub>13</sub> H <sub>22</sub> N <sub>4</sub> O <sub>5</sub> | 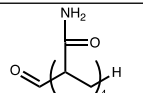   | 73.02766, 59.0485                                                                                                                    | 25         |                                                                                      | 86.04681                                                                                    | 1.8517        | 0                          | 3a             |
| C <sub>14</sub> H <sub>23</sub> N <sub>5</sub> O <sub>6</sub> |    | 59.04853, 69.0326, 217.01617                                                                                                         | 13.33      |                                                                                      | 59.04853, 73.02766                                                                          | 7.9931        | 1                          | 3b             |
| C <sub>15</sub> H <sub>19</sub> NO <sub>11</sub>              |    | 281.06470, 337.05777                                                                                                                 | 22.22      |                                                                                      | 140.03326                                                                                   | 11.6851       | 0                          | 3b             |
| C <sub>15</sub> H <sub>25</sub> N <sub>5</sub> O <sub>6</sub> |   | 73.02733, 111.04287, 115.0862                                                                                                        | 16.67      |                                                                                      | 73.02733, 87.04317, 115.08627                                                               | 20.1398       | 2                          | 3b             |
| C <sub>15</sub> H <sub>26</sub> N <sub>4</sub> O <sub>6</sub> |  | 59.04833, 69.03239, 73.02747, 73.06451, 86.03547, 87.04311, 89.05870, 95.04831, 99.04323, 103.07465, 113.05862, 129.05313, 131.06931 | 46.43      |  | 69.03239, 73.02747, 86.03547, 87.04311, 99.04323, 101.05865, 129.05313, 217.10741, 219.1217 | 38.4583       |                            | 3a             |
| C <sub>16</sub> H <sub>26</sub> N <sub>4</sub> O <sub>7</sub> |  | 73.0276, 87.04321, 89.05924                                                                                                          | 75         |  | 73.0276, 87.04321                                                                           | 23.943        |                            | 3a             |
| C <sub>16</sub> H <sub>27</sub> N <sub>5</sub> O <sub>6</sub> |  | 73.02764, 283.17529                                                                                                                  | 25         |                                                                                      | 73.02764, 87.04327, 283.17529, 351.16748                                                    | 65.4826       | 2                          | 2b             |



|                         |                                                                                   |                                                                                                                                                                                       |       |                                                                                    |                                                                                                                                                                                                                                        |          |   |    |
|-------------------------|-----------------------------------------------------------------------------------|---------------------------------------------------------------------------------------------------------------------------------------------------------------------------------------|-------|------------------------------------------------------------------------------------|----------------------------------------------------------------------------------------------------------------------------------------------------------------------------------------------------------------------------------------|----------|---|----|
| $C_{18}H_{30}N_4O_8$    | 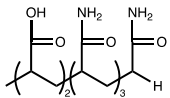 | 84.08051, 87.04317,<br>89.05883<br>99.04305, 113.05898,<br>115.08568, 129.10156,<br>131.06981, 133.08522,<br>175.09659                                                                | 40    |                                                                                    | 87.04317, 99.04305,<br>113.05898, 115.08568,<br>129.10156, 131.06981                                                                                                                                                                   | 36.0594  | 6 | 2b |
| $C_{18}H_{31}N_5O_7$    |  | 73.0276, 87.04319,<br>89.05886                                                                                                                                                        | 62.5  |                                                                                    | 73.02771, 87.04341,<br>89.05927                                                                                                                                                                                                        | 27.9099  | 2 | 2b |
| $C_{28}H_{47}N_9O_{10}$ |  | 89.05862, 102.05399,<br>129.10135, 200.09380,<br>653.31519                                                                                                                            | 10.64 |                                                                                    | 102.05399, 129.10135,<br>257.13626, 513.25439,<br>539.30359, 609.30963,<br>653.31519                                                                                                                                                   | 380.2097 | 3 | 3b |
| $C_{30}H_{50}N_8O_{12}$ |  | 73.02708, 84.04314,<br>87.04288, 102.05360,<br>115.08513, 129.10075,<br>201.12315, 211.10606,<br>216.08656, 243.07901,<br>426.18860, 554.28259,<br>582.27661, 583.27380,<br>597.28674 | 18.29 |  | 73.02708, 84.04314,<br>87.04288, 115.08513,<br>129.10075, 198.07576,<br>201.12315, 216.08656,<br>243.13409, 398.18976,<br>410.19006, 425.19083,<br>426.1886, 537.25537,<br>554.28259, 555.29187,<br>581.27814, 597.28674,<br>697.35425 | 192.1527 |   | 3b |

237 **Fig. S12-23** showed examples of FISH scoring analysis for results with a FISH score >10.  
 238 The green colored features represent features matched with the *in silico* fragmentation spectra.  
 239 Only features the with the highest scores for each feature were listed in **Fig. S24**.

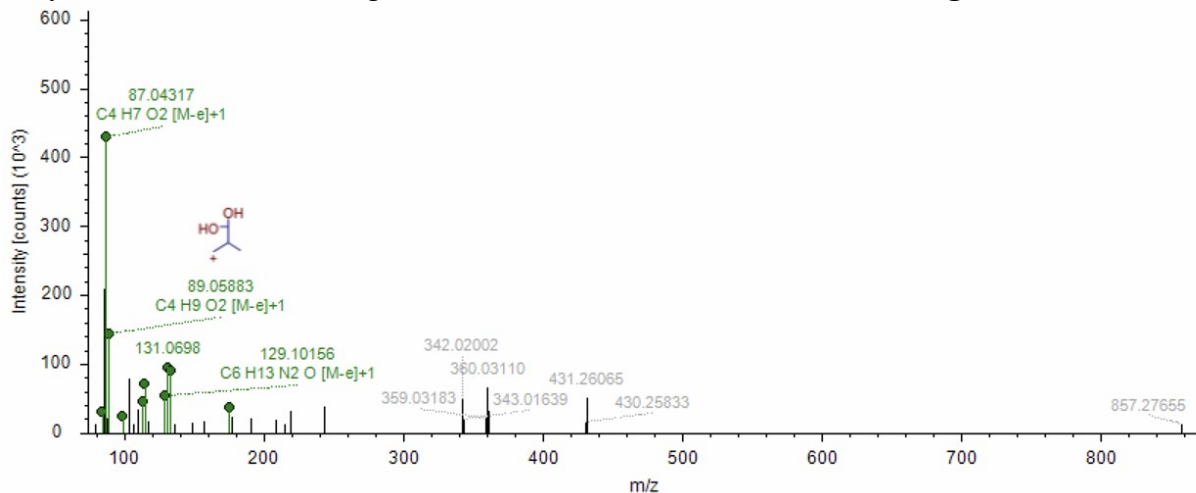

240  
 241 **Figure S12.** The MS<sup>2</sup> spectra of formula C<sub>18</sub>H<sub>30</sub>N<sub>4</sub>O<sub>8</sub> whose structure was shown in **Fig. 5A**. The  
 242 green highlighted peaks represent matches with the theoretical spectra of the given structure.  
 243  
 244

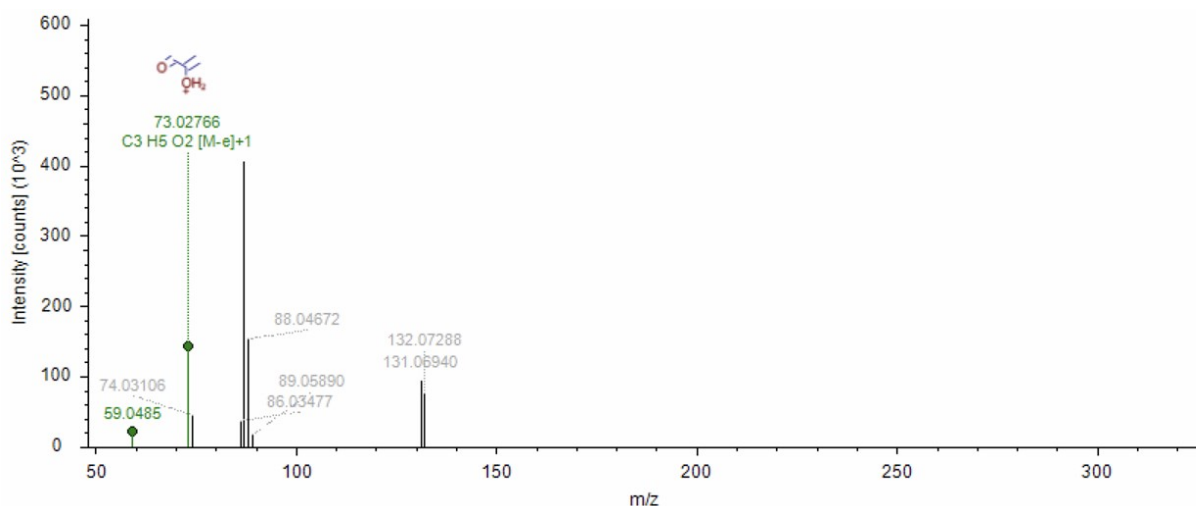

245  
 246 **Figure S13.** The MS<sup>2</sup> spectra of formula C<sub>13</sub>H<sub>22</sub>N<sub>4</sub>O<sub>5</sub> whose structure was shown in **Fig. 5B**. The  
 247 green highlighted peaks represent matches with the theoretical spectra of the given structure.

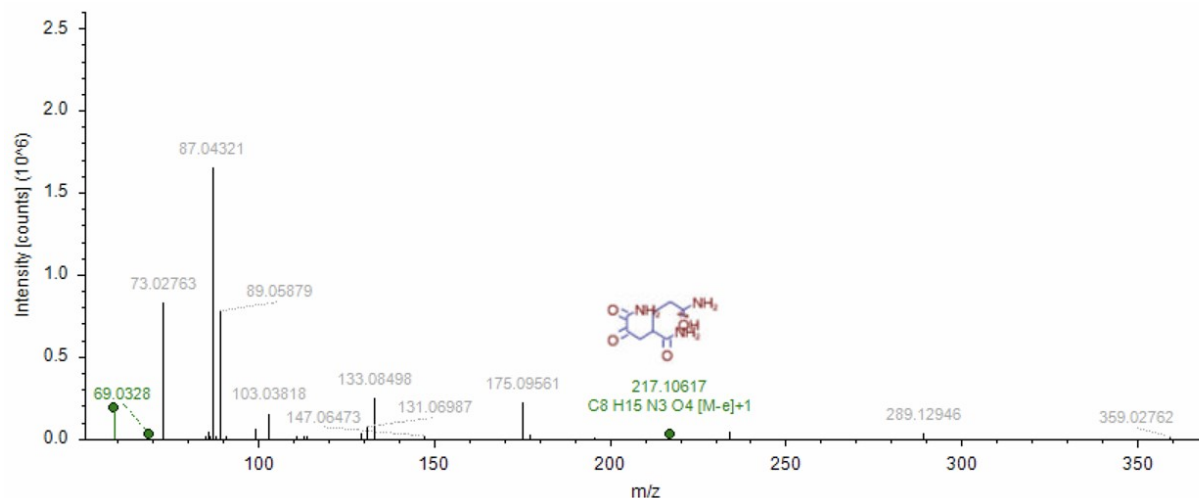

248

249 **Figure S14.** The MS<sup>2</sup> spectra of formula C<sub>14</sub>H<sub>23</sub>N<sub>5</sub>O<sub>6</sub> whose structure was shown in **Fig. 5C**. The  
 250 green highlighted peaks represent matches with the theoretical spectra of the given structure.

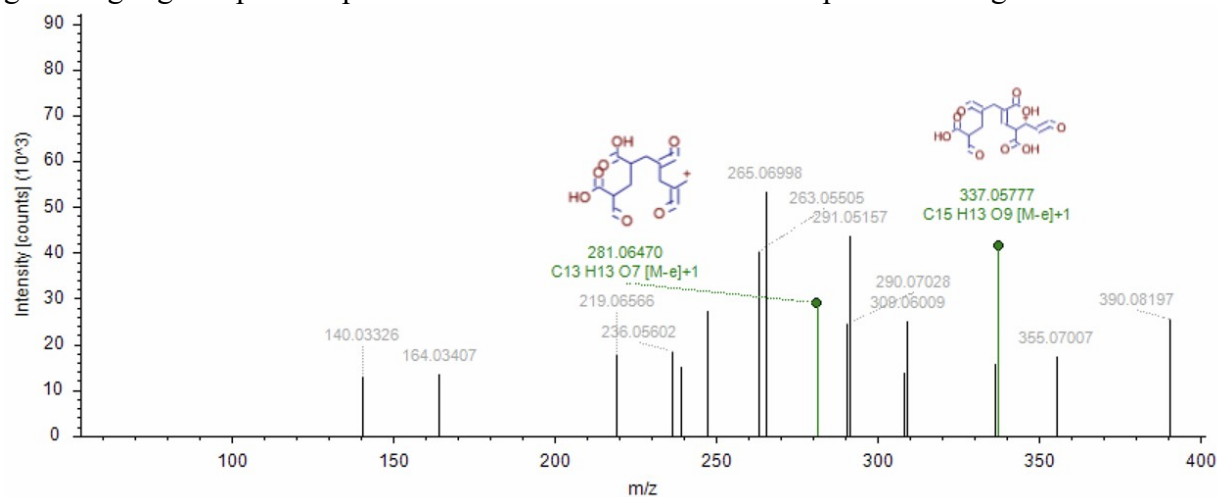

251

252 **Figure S15.** The MS<sup>2</sup> spectra of formula C<sub>15</sub>H<sub>19</sub>NO<sub>11</sub> whose structure was shown in **Fig. S23A**.  
 253 The green highlighted peaks represent matches with the theoretical spectra of the given structure.  
 254

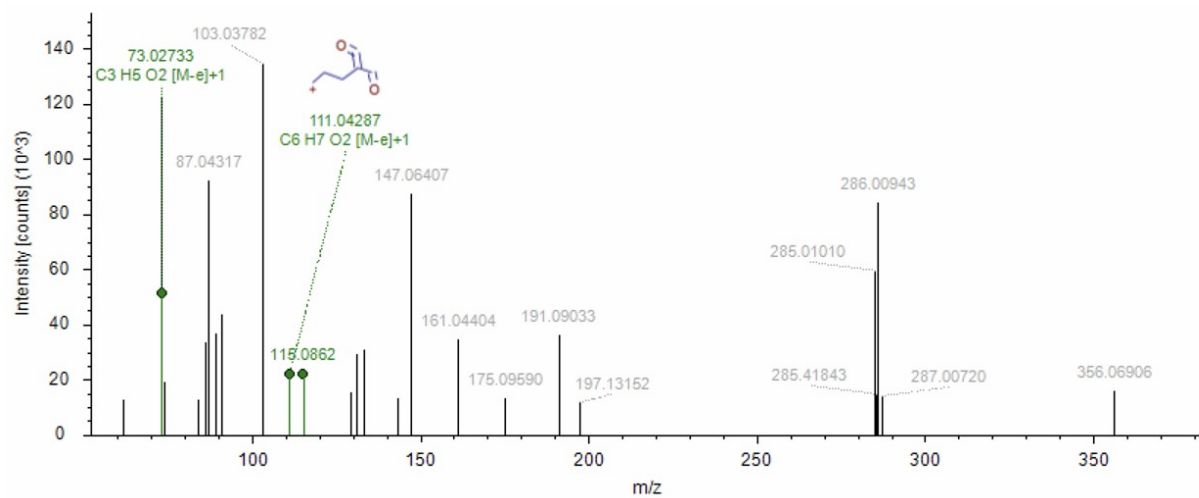

255

256 **Figure S16.** The MS<sup>2</sup> spectra of formula C<sub>15</sub>H<sub>25</sub>N<sub>5</sub>O<sub>6</sub> whose structure was shown in **Fig. S23B.**  
 257 The green highlighted peaks represent matches with the theoretical spectra of the given structure.  
 258

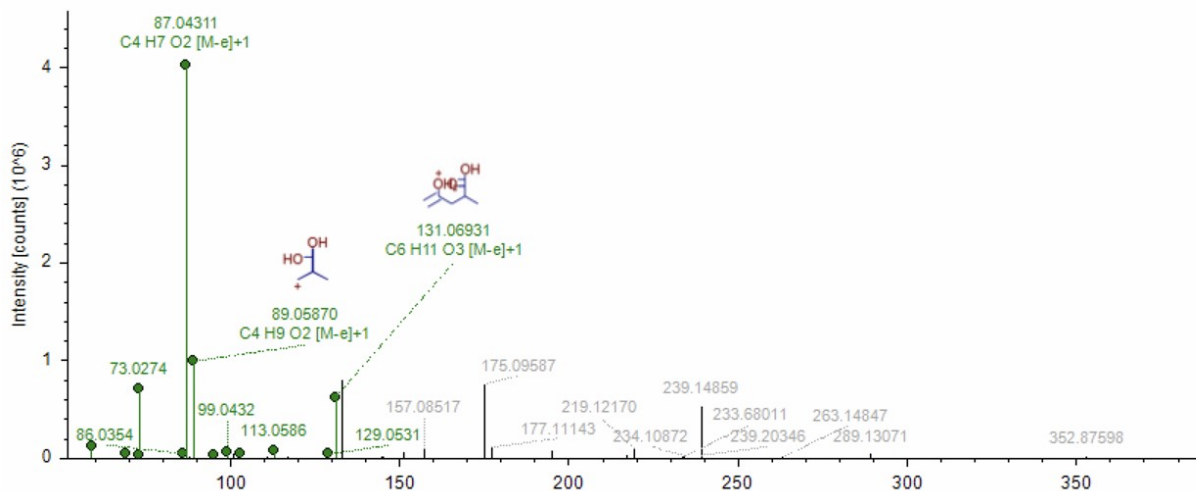

259  
 260 **Figure S17.** The MS<sup>2</sup> spectra of formula C<sub>15</sub>H<sub>26</sub>N<sub>4</sub>O<sub>6</sub> whose structure was shown in **Fig. S23C.**  
 261 The green highlighted peaks represent matches with the theoretical spectra of the given structure.

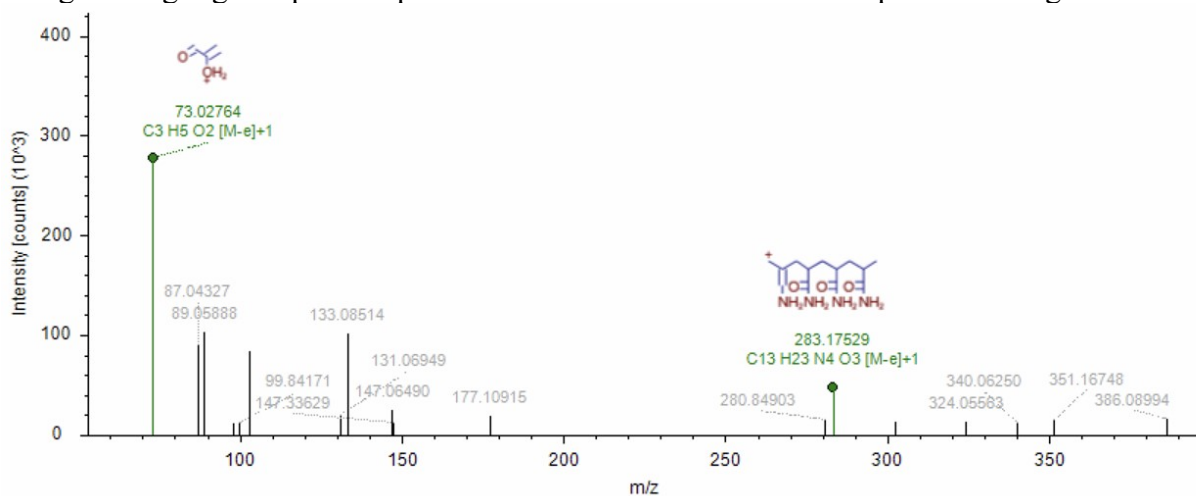

262  
 263 **Figure S18.** The MS<sup>2</sup> spectra of formula C<sub>16</sub>H<sub>27</sub>N<sub>5</sub>O<sub>6</sub> whose structure was shown in **Fig. S23D.**  
 264 The green highlighted peaks represent matches with the theoretical spectra of the given structure.  
 265

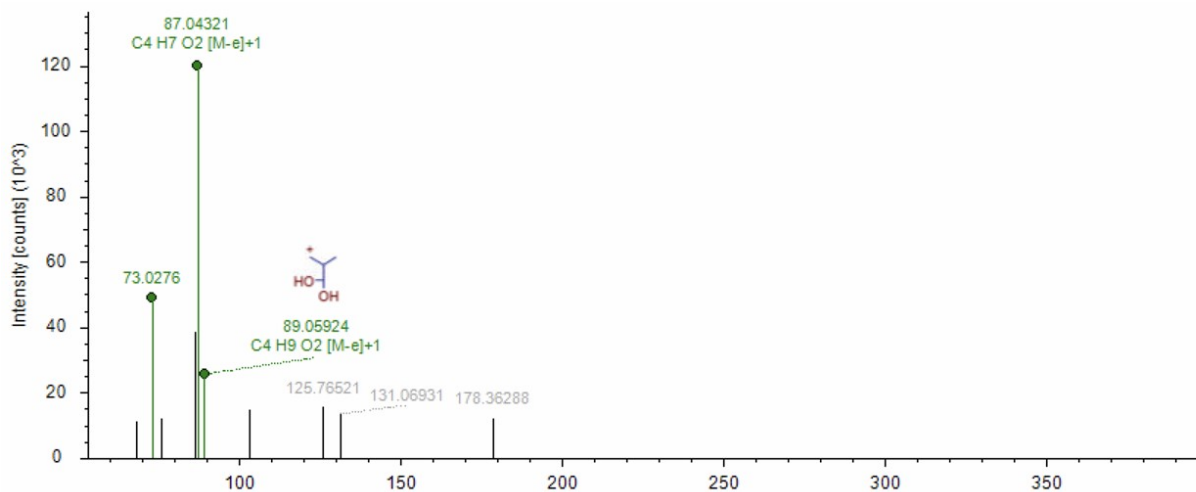

266  
 267 **Figure S19.** The MS<sup>2</sup> spectra of formula C<sub>16</sub>H<sub>26</sub>N<sub>4</sub>O<sub>7</sub> whose structure was shown in **Fig. S23E**.  
 268 The green highlighted peaks represent matches with the theoretical spectra of the given structure.  
 269

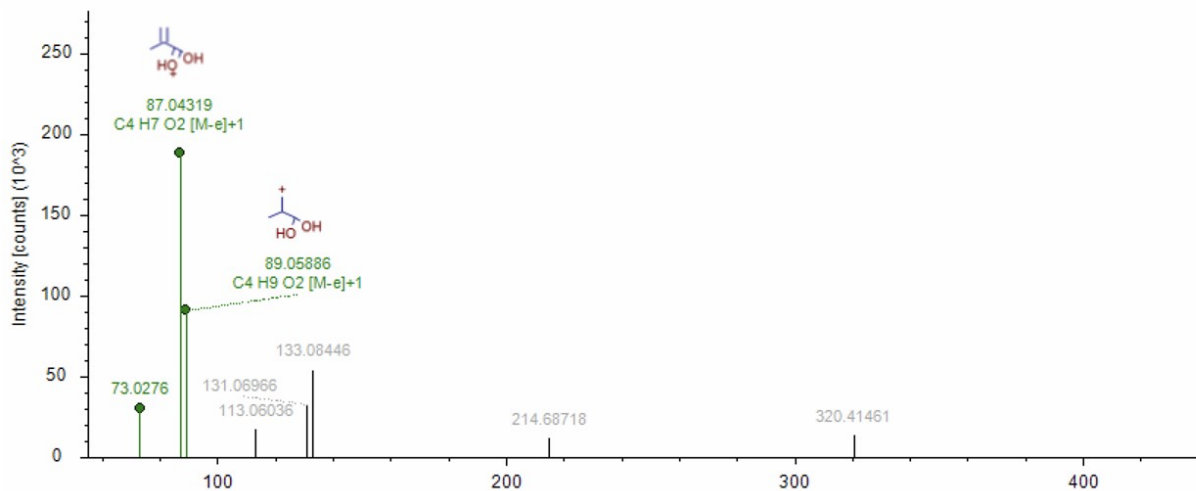

270  
 271 **Figure S20.** The MS<sup>2</sup> spectra of formula C<sub>18</sub>H<sub>31</sub>N<sub>5</sub>O<sub>7</sub> whose structure was shown in **Fig. S23F**.  
 272 The green highlighted peaks represent matches with the theoretical spectra of the given structure.

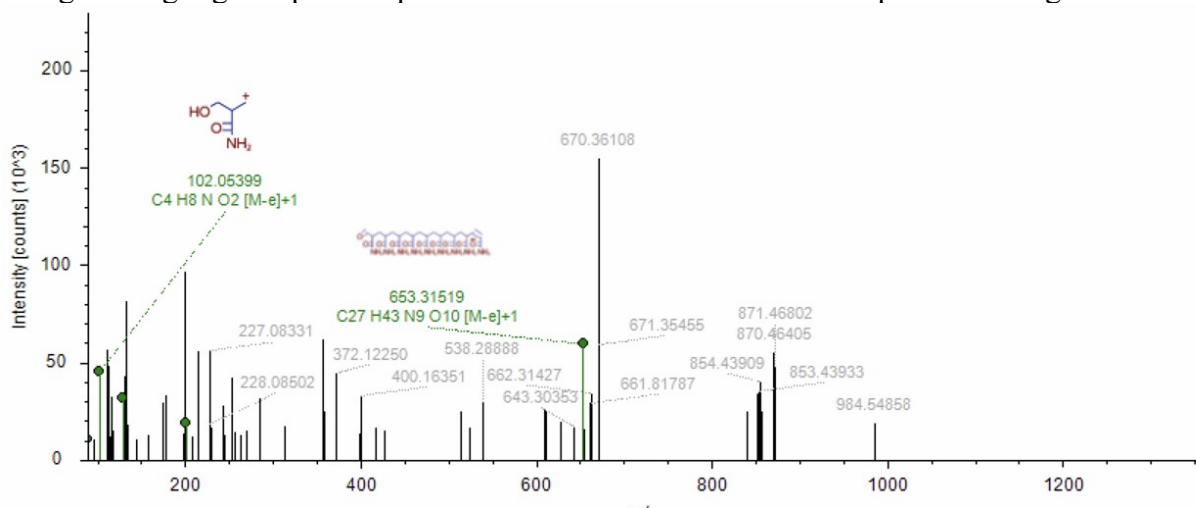

273

274 **Figure S21.** The MS<sup>2</sup> spectra of formula C<sub>28</sub>H<sub>47</sub>N<sub>9</sub>O<sub>10</sub> whose structure was shown in **Fig. S23G.**  
 275 The green highlighted peaks represent matches with the theoretical spectra of the given structure.

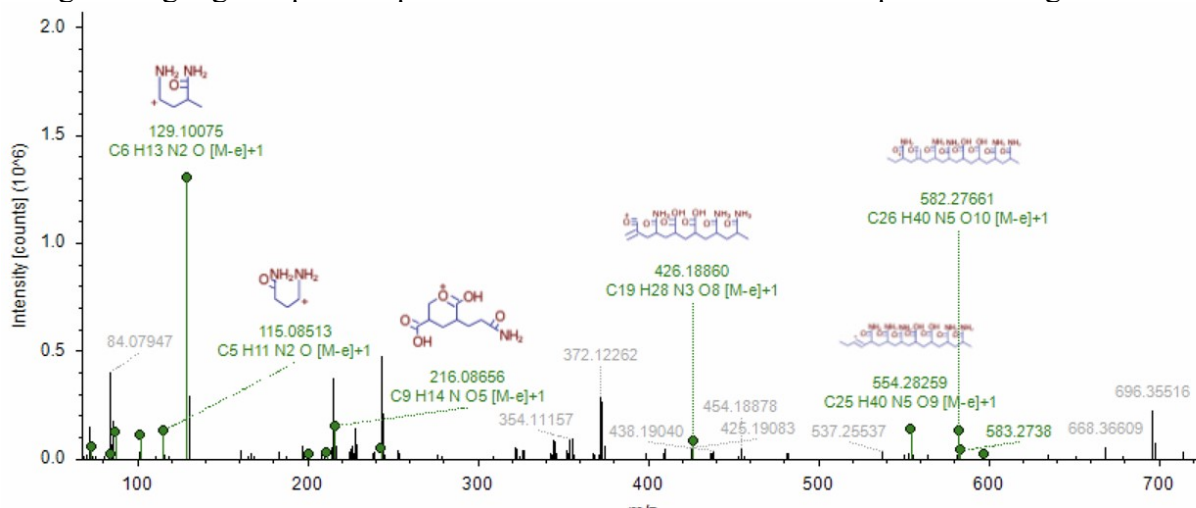

276  
 277  
 278 **Figure S22.** The MS<sup>2</sup> spectra of formula C<sub>30</sub>H<sub>50</sub>N<sub>8</sub>O<sub>12</sub> whose structure was shown in **Fig. S23H.**  
 279 The green highlighted peaks represent matches with the theoretical spectra of the given structure.  
 280

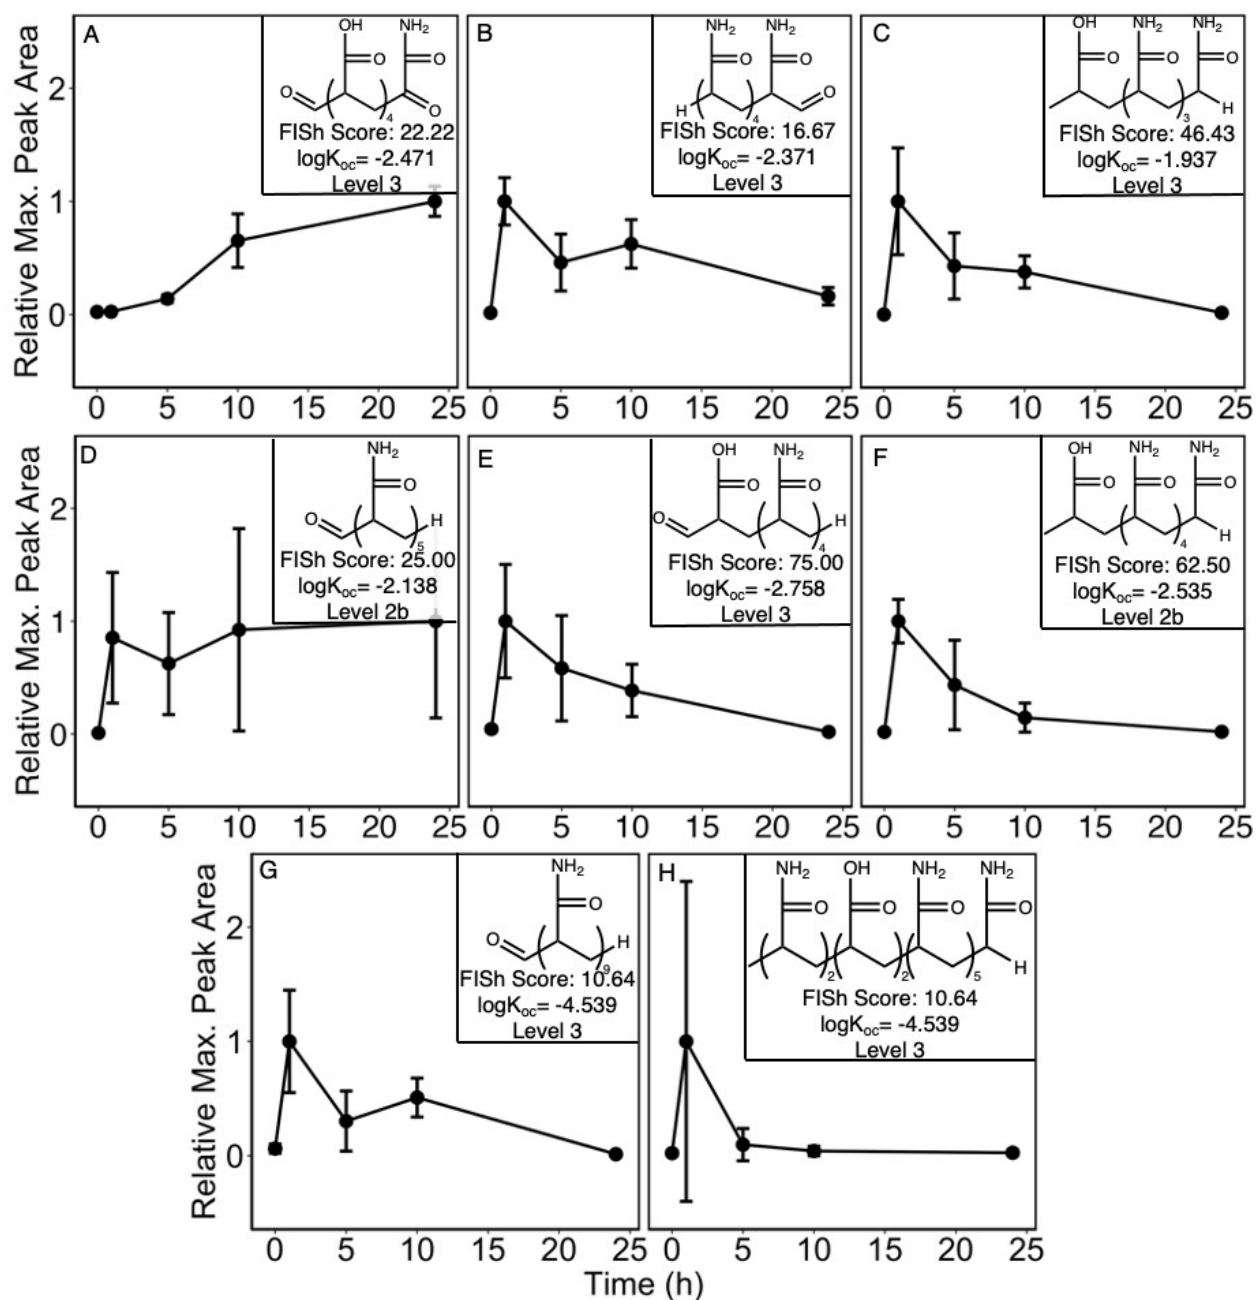

281

282 **Figure S23.** The peak area of feature matches relative to the maximum peak area of feature in each  
 283 sample variation over time. These features were selected due to their high FISH score. The inset  
 284 box included structure, FISH score, calculated  $\log K_{oc}$  on EPISuite software, and the Schymanski  
 285 level of confidence for nontarget analysis.<sup>9</sup> The error bars represented the standard deviation  
 286 between triplicate samples at each time point. **A)** A 5-repeating unit oligomer with aldehyde and  
 287 ketone terminal groups and four acrylate monomers was determined as a level 3 confidence match.  
 288 **B)** This 5-repeating unit oligomer with aldehyde and methylene terminal groups and no acrylate  
 289 monomers was determined as a level 3 confidence match. **C)** This 5-repeating unit oligomer with  
 290 methyl and methylene terminal groups and one acrylate monomer was determined as a level 3  
 291 confidence. **D)** This 5-repeating unit oligomer with methyl and aldehyde terminal groups and no  
 292 acrylate monomers was determined as a level 2b confidence match. **E)** A 5-repeating unit oligomer

293 with aldehyde and methyl terminal groups and one acrylate monomer was determined as a level 3  
294 confidence match. **F)** This 6-repeating unit oligomer with methyl and methylene terminal groups  
295 and one acrylate monomer was determined as a level 2b confidence match. **G)** This 9-repeating  
296 unit oligomer with methyl and aldehyde terminal groups and acrylate monomers was determined  
297 as a level 3 confidence match. **H)** This 10-repeating unit oligomer with methyl and methylene  
298 terminal groups and two acrylate monomers was determined as a level 3 confidence match. The  
299 abundance of **A** feature relative to all other features in the sample increased over 24 h; the  
300 abundance of all other features remained constant or declined over 24 h.





302 **References**

- 303 1 K. De Bruycker, A. Welle, S. Hirth, S. J. Blanksby and C. Barner-Kowollik, Mass  
304 spectrometry as a tool to advance polymer science, *Nat Rev Chem*, 2020, **4**, 257–268.
- 305 2 B. Xiong, R. D. Loss, D. Shields, T. Pawlik, R. Hochreiter, A. L. Zydney and M. Kumar,  
306 Polyacrylamide degradation and its implications in environmental systems, *NPJ Clean*  
307 *Water*, 2018, **1**, 17.
- 308 3 B. Xiong, Z. Miller, S. Roman-White, T. Tasker, B. Farina, B. Piechowicz, W. D. Burgos,  
309 P. Joshi, L. Zhu, C. A. Gorski, A. L. Zydney and M. Kumar, Chemical Degradation of  
310 Polyacrylamide during Hydraulic Fracturing, *Environ Sci Technol*, 2018, **52**, 327–336.
- 311 4 D. Griller and K. U. Ingold, Persistent Carbon-Centered Radicals, *Acc Chem Res*, 1976, **9**,  
312 13–19.
- 313 5 L. Costa, M. P. Luda and L. Trossarelli, Ultra high molecular weight polyethylene - II.  
314 Thermal-and photo-oxidation, *Polym Degrad Stab*, 1997, **58**, 41–54.
- 315 6 N. N. Lichtin, Selectivity in fast reactions of aqueous OH-radicals with amides, *Isr J*  
316 *Chem*, 1971, **9**, 397–403.
- 317 7 U. Grollmann and W. Schnabel, Free radical-induced oxidative degradation of  
318 polyacrylamide in aqueous solution, *Polym Degrad Stab*, 1982, **4**, 203–212.
- 319 8 J. Suzuki, H. Harada and S. Suzuki, Ozone treatment of water-soluble polymers. V.  
320 ultraviolet irradiation effects on the ozonization of polyacrylamide, *J Appl Polym Sci*,  
321 1979, **24**, 999–1006.
- 322 9 E. L. Schymanski, J. Jeon, R. Gulde, K. Fenner, M. Ruff, H. P. Singer and J. Hollender,  
323 Identifying small molecules via high resolution mass spectrometry: Communicating  
324 confidence, *Environ Sci Technol*, 2014, **48**, 2097–2098.
- 325
